# Supplementary material for: A Reaction-Diffusion Model of ROS-Induced ROS Release in a Mitochondrial Network
Source: PubMed Central journal article supplement (PMC2813265; doi:10.1371/journal.pcbi.1000657), 2010-01-29
Supplement: pcbi.1000657.s002.pdf [file pcbi.1000657.s002.pdf]

**Table S2. Mitochondrial energetics and ROS-induced-ROS-release model (ME-RIRR) parameters.**

**S2.1 Tricarboxylic acid cycle**

| Symbol                        | Value                 | Units            | Description                                   | Eq. |
|-------------------------------|-----------------------|------------------|-----------------------------------------------|-----|
| [AcCoA]                       | 1.0                   | mM               | Acetyl CoA concentration                      | E17 |
| $k_{\text{cat}}^{\text{CS}}$  | 0.05                  | $\text{ms}^{-1}$ | Catalytic constant of CS                      | E17 |
| $E_{\text{T}}^{\text{CS}}$    | 0.4                   | mM               | Concentration of CS                           | E17 |
| $K_{\text{M}}^{\text{AcCoA}}$ | $1.26 \times 10^{-2}$ | mM               | Michaelis constant for AcCoA                  | E17 |
| $K_{\text{M}}^{\text{OAA}}$   | $6.4 \times 10^{-4}$  | mM               | Michaelis constant for OAA                    | E17 |
| $C_{\text{Kint}}$             | 1.0                   | mM               | Sum of TCA cycle intermediates' concentration | E12 |
| $k_{\text{f}}^{\text{ACO}}$   | $1.25 \times 10^{-2}$ | $\text{ms}^{-1}$ | Forward rate constant of ACO                  | E18 |
| $K_{\text{E}}^{\text{ACO}}$   | 2.22                  |                  | Equilibrium constant of ACO                   | E18 |
| $K_{\text{ADP}}^{\text{a}}$   | 0.62                  | mM               | Activation constant by ADP                    | E19 |
| $K_{\text{Ca}}^{\text{a}}$    | 0.0005                | mM               | Activation constant for $\text{Ca}^{2+}$      | E19 |
| $K_{\text{i,NADH}}$           | 0.19                  | mM               | Inhibition constant by NADH                   | E20 |
| $k_{\text{cat}}^{\text{IDH}}$ | 0.03                  | $\text{ms}^{-1}$ | Rate constant of IDH                          | E21 |
| $E_{\text{T}}^{\text{IDH}}$   | 0.109                 | mM               | Concentration of IDH                          | E21 |
| $[\text{H}^+]$                | $2.5 \times 10^{-5}$  | mM               | Matrix proton concentration                   | E21 |
| $k_{\text{h,1}}$              | $8.1 \times 10^{-5}$  | mM               | Ionization constant of IDH                    | E21 |
| $k_{\text{h,2}}$              | $5.98 \times 10^{-5}$ | mM               | Ionization constant of IDH                    | E21 |

|                                 |                       |                                 |                                                |     |
|---------------------------------|-----------------------|---------------------------------|------------------------------------------------|-----|
| $K_M^{\text{ISOC}}$             | 1.52                  | mM                              | Michaelis constant for isocitrate              | E21 |
| $n_i$                           | 2.0                   |                                 | Cooperativity for isocitrate                   | E21 |
| $K_M^{\text{NAD}}$              | 0.923                 | mM                              | Michaelis constant for $\text{NAD}^+$          | E21 |
| $K_D^{\text{Mg}^{2+}}$          | 0.0308                | mM                              | Activation constant for $\text{Mg}^{2+}$       | E22 |
| $K_D^{\text{Ca}^{2+}}$          | $1.27 \times 10^{-3}$ | mM                              | Activation constant for $\text{Ca}^{2+}$       | E22 |
| $E_T^{\text{KGDH}}$             | 0.5                   | mM                              | Concentration of KGDH                          | E23 |
| $k_{\text{cat}}^{\text{KGDH}}$  | 0.05                  | $\text{ms}^{-1}$                | Rate constant of KGDH                          | E23 |
| $K_M^{\alpha\text{KG}}$         | 1.94                  | mM                              | Michaelis constant for $\alpha\text{KG}$       | E23 |
| $K_M^{\text{NAD}}$              | 38.7                  | mM                              | Michaelis constant for NAD                     | E23 |
| $n_{\alpha\text{KG}}$           | 1.2                   |                                 | Hill coefficient of KGDH for $\alpha\text{KG}$ | E23 |
| $\text{Mg}^{2+}$                | 0.4                   | mM                              | $\text{Mg}^{2+}$ concentration in mitochondria | E22 |
| $k_f^{\text{SL}}$               | $5.0 \times 10^{-4}$  | $\text{mM}^{-1} \text{ms}^{-1}$ | Forward rate constant of SL                    | E24 |
| $K_E^{\text{SL}}$               | 3.115                 |                                 | Equilibrium constant of the SL reaction        | E24 |
| [CoA]                           | 0.02                  | mM                              | Coenzyme A concentration                       | E24 |
| $k_{\text{cat}}^{\text{SDH}}$   | $3.0 \times 10^{-3}$  | $\text{ms}^{-1}$                | Rate constant of SDH                           | E25 |
| $E_T^{\text{SDH}}$              | 0.5                   | mM                              | SDH enzyme concentration                       | E25 |
| $K_M^{\text{Suc}}$              | 0.03                  | mM                              | Michaelis constant for succinate               | E25 |
| $K_i^{\text{FUM}}$              | 1.3                   | mM                              | Inhibition constant by fumarate                | E25 |
| $K_{i,\text{sdh}}^{\text{OAA}}$ | 0.15                  | mM                              | Inhibition constant by oxalacetate             | E25 |

|                 |                       |           |                                                           |      |
|-----------------|-----------------------|-----------|-----------------------------------------------------------|------|
| $k_f^{FH}$      | $3.32 \times 10^{-3}$ | $ms^{-1}$ | Forward rate constant for FH                              | E26  |
| $K_E^{FH}$      | 1.0                   |           | Equilibrium constant of FH                                | E26  |
| $k_{h1}$        | $1.13 \times 10^{-5}$ | mM        | Ionization constant of MDH                                | E27  |
| $k_{h2}$        | 26.7                  | mM        | Ionization constant of MDH                                | A153 |
| $k_{h3}$        | $6.68 \times 10^{-9}$ | mM        | Ionization constant of MDH                                | E28  |
| $k_{h4}$        | $5.62 \times 10^{-6}$ | mM        | Ionization constant of MDH                                | E28  |
| $k_{offset}$    | $3.99 \times 10^{-2}$ |           | pH-independent term in the pH<br>activation factor of MDH | E27  |
| $k_{cat}^{MDH}$ | 0.111                 | $ms^{-1}$ | Rate constant of MDH                                      | E29  |
| $E_T^{MDH}$     | 0.154                 | mM        | Total MDH enzyme concentration                            | E29  |
| $K_M^{MAL}$     | 1.493                 | mM        | Michaelis constant for malate                             | E29  |
| $K_i^{OAA}$     | $3.1 \times 10^{-3}$  | mM        | Inhibition constant for oxalacetate                       | E29  |
| $K_M^{NAD}$     | 0.2244                | mM        | Michaelis constant for $NAD^+$                            | E29  |
| [GLU]           | 10.0                  | mM        | Glutamate concentration                                   | E30  |
| $k_f^{AAT}$     | $6.44 \times 10^{-4}$ | $ms^{-1}$ | Forward rate constant of AAT                              | E30  |
| $K_E^{AAT}$     | 6.6                   |           | Equilibrium constant of AAT                               | E30  |
| $k_{ASP}$       | $1.5 \times 10^{-6}$  | $ms^{-1}$ | Rate constant of aspartate<br>consumption                 | E30  |

## S2.2. Oxidative phosphorylation

| Symbol                 | Value                   | Units            | Description                                                             | Eq. |
|------------------------|-------------------------|------------------|-------------------------------------------------------------------------|-----|
| $r_a$                  | $6.394 \times 10^{-13}$ | $\text{ms}^{-1}$ | Sum of products of rate constants                                       | E31 |
| $r_b$                  | $1.762 \times 10^{-16}$ | $\text{ms}^{-1}$ | Sum of products of rate constants                                       | E32 |
| $r_{c1}$               | $2.656 \times 10^{-22}$ | $\text{ms}^{-1}$ | Sum of products of rate constants                                       | E31 |
| $r_{c2}$               | $8.632 \times 10^{-30}$ | $\text{ms}^{-1}$ | Sum of products of rate constants                                       | E31 |
| $r_1$                  | $2.077 \times 10^{-18}$ |                  | Sum of products of rate constants                                       | E31 |
| $r_2$                  | $1.728 \times 10^{-9}$  |                  | Sum of products of rate constants                                       | E31 |
| $r_3$                  | $1.059 \times 10^{-26}$ |                  | Sum of products of rate constants                                       | E31 |
| $\rho^{\text{res}}$    | $3.0 \times 10^{-3}$    | mM               | Concentration of electron carriers<br>(respiratory complexes I-III-IV)  | E31 |
| $K_{\text{res}}$       | $1.35 \times 10^{18}$   |                  | Equilibrium constant of respiration                                     | E33 |
| $\rho^{\text{res(F)}}$ | $3.75 \times 10^{-4}$   | mM               | Concentration of electron carriers<br>(respiratory complexes II-III-IV) | E35 |
| $\Delta\Psi_B$         | 50                      | mV               | Phase boundary potential                                                | E31 |
| $g$                    | 0.85                    |                  | Correction factor for voltage                                           | E31 |
| $K_{\text{res(F)}}$    | $5.765 \times 10^{13}$  |                  | Equilibrium constant of FADH <sub>2</sub><br>oxidation                  | E36 |
| [FADH2]                | 1.24                    | mM               | Concentration of FADH <sub>2</sub> (reduced)                            | E36 |
| [FAD]                  | 0.01                    | mM               | Concentration of FAD (oxidized)                                         | E36 |
| $p_a$                  | $1.656 \times 10^{-8}$  | $\text{ms}^{-1}$ | Sum of products of rate constants                                       | E37 |
| $p_b$                  | $3.373 \times 10^{-10}$ | $\text{ms}^{-1}$ | Sum of products of rate constants                                       | E38 |
| $p_{c1}$               | $9.651 \times 10^{-17}$ | $\text{ms}^{-1}$ | Sum of products of rate constants                                       | E37 |
| $p_{c2}$               | $4.585 \times 10^{-17}$ | $\text{ms}^{-1}$ | Sum of products of rate constants                                       | E37 |

|                   |                        |                                     |                                         |     |
|-------------------|------------------------|-------------------------------------|-----------------------------------------|-----|
| $p_1$             | $1.346 \times 10^{-8}$ |                                     | Sum of products of rate constants       | E37 |
| $p_2$             | $7.739 \times 10^{-7}$ |                                     | Sum of products of rate constants       | E37 |
| $p_3$             | $6.65 \times 10^{-15}$ |                                     | Sum of products of rate constants       | E37 |
| $\rho^{F_1}$      | 1.5                    | mM                                  | Concentration of $F_1F_0$ -ATPase       | E37 |
| $K_{F_1}$         | $1.71 \times 10^6$     |                                     | Equilibrium constant of ATP hydrolysis  | E37 |
| $P_i$             | 2.0                    | mM                                  | Inorganic phosphate concentration       | E37 |
| $C_A$             | 1.5                    | mM                                  | Total sum of mito adenine nucleotides   | E3  |
| $g_H$             | $1.0 \times 10^{-8}$   | $\text{mM ms}^{-1} \text{ mV}^{-1}$ | Ionic conductance of the inner membrane | E40 |
| $\Delta\text{pH}$ | -0.6                   | pH units                            | pH gradient across the inner memb.      | E40 |
| $C_{PN}$          | 10.0                   | mM                                  | Total sum of mito pyridine nucleotides  | E34 |
| $C_{\text{mito}}$ | $1.812 \times 10^{-3}$ | $\text{mM mV}^{-1}$                 | Inner membrane capacitance              | E1  |

### S2.3 Mitochondrial Ca<sup>2+</sup> uniporter and Ca<sup>2+</sup>-Na<sup>+</sup> exchanger

| Symbol                   | Value                 | Units               | Description                                                               | Eq. |
|--------------------------|-----------------------|---------------------|---------------------------------------------------------------------------|-----|
| $V_{\max}^{\text{uni}}$  | 0.0275                | mM ms <sup>-1</sup> | Vmax uniport Ca <sup>2+</sup> transport                                   | E42 |
| $\Delta\Psi^{\circ}$     | 91                    | mV                  | Offset membrane potential                                                 | E42 |
| $K_{\text{act}}$         | $3.8 \times 10^{-4}$  | mM                  | Activation constant                                                       | E42 |
| $K_{\text{trans}}$       | 0.019                 | mM                  | $K_d$ for translocated Ca <sup>2+</sup>                                   | E42 |
| L                        | 110.0                 |                     | Keq for conformational transitions in uniporter                           | E42 |
| $n_a$                    | 2.8                   |                     | Uniporter activation cooperativity                                        | E42 |
| $V_{\max}^{\text{NaCa}}$ | $1.0 \times 10^{-4}$  | mM ms <sup>-1</sup> | Vmax of Na <sup>+</sup> /Ca <sup>2+</sup> antiporter                      | E43 |
| b                        | 0.5                   |                     | $\Delta\Psi_m$ dependence of Na <sup>+</sup> /Ca <sup>2+</sup> antiporter | E43 |
| $K_{\text{Na}}$          | 9.4                   | mM                  | Antiporter Na <sup>+</sup> constant                                       | E43 |
| $K_{\text{Ca}}$          | $3.75 \times 10^{-4}$ | mM                  | Antiporter Ca <sup>2+</sup> constant                                      | E43 |
| n                        | 3                     |                     | Na <sup>+</sup> /Ca <sup>2+</sup> antiporter cooperativity                | E43 |
| $\delta$                 | $3.0 \cdot 10^{-4}$   |                     | Fraction of free [Ca <sup>2+</sup> ] <sub>m</sub>                         | E51 |

## S2.4 ROS induced ROS release

| Symbol             | Value                     | Units                            | Description                                                                                             | Eqn. |
|--------------------|---------------------------|----------------------------------|---------------------------------------------------------------------------------------------------------|------|
| $G_L$              | 0.0782                    | $\text{mM s}^{-1} \text{V}^{-1}$ | Leak conductance for IMAC                                                                               | E49  |
| $G_{\max}$         | 7.82                      | $\text{mM s}^{-1} \text{V}^{-1}$ | Integral Conductance of IMAC at saturation                                                              | E49  |
| $a$                | $1.0 \cdot 10^{-3}$       |                                  | Basal IMAC conductance                                                                                  | E49  |
| $b$                | $1.0 \cdot 10^4$          |                                  | Activation factor by cytoplasmic $\text{O}_2^{\cdot -}$                                                 | E49  |
| $\kappa$           | 70                        | $\text{V}^{-1}$                  | Steepness factor                                                                                        | E49  |
| $\Delta\Psi_m^b$   | 0.004                     | V                                | Potential at half saturation                                                                            | E49  |
| $K_{cc}$           | 0.01                      | mM                               | Activation constant of IMAC by $\text{O}_2^{\cdot -}$                                                   | E49  |
| $k_{\text{SOD}}^1$ | $2.4 \cdot 10^6$          | $\text{mM}^{-1} \text{s}^{-1}$   | Second order rate constant of conversion between native oxidized and reduced superoxide dismutase (SOD) | E44  |
| $k_{\text{SOD}}^3$ | $1.7 \cdot 10^4$          | $\text{mM}^{-1} \text{s}^{-1}$   | Second order rate constant of conversion between native reduced SOD and its inactive form               | E44  |
| $k_{\text{SOD}}^5$ | $5.0 \cdot 10^{-1}$       | $\text{s}^{-1}$                  | First order rate constant for conversion between inactive and active oxidized SOD                       | E44  |
| $E_{\text{SOD}}^T$ | $0.4 - 2.5 \cdot 10^{-3}$ | mM                               | Intracellular concentration of SOD                                                                      | E44  |
| $K_i^{H_2O_2}$     | 0.5                       | mM                               | Inhibition constant for $\text{H}_2\text{O}_2$                                                          | E44  |
| $k_{\text{CAT}}^1$ | $4.8 \cdot 10^4$          | $\text{mM}^{-1} \text{s}^{-1}$   | Rate constant of catalase (CAT)                                                                         | E45  |
| $E_{\text{CAT}}^T$ | 0.001                     | mM                               | Intracellular concentration of CAT                                                                      | E45  |
| $fr$               | 50                        |                                  | Hydrogen peroxide inhibition factor of CAT                                                              | E45  |
| $E_{\text{GPX}}^T$ | 0.00141                   | mM                               | Intracellular concentration of glutathione peroxidase (GPX)                                             | E45  |
| $\Phi_1$           | 0.15-5.0                  | mM s                             | Constant for GPX activity                                                                               | E46  |
| $\Phi_2$           | 0.5                       | mM s                             | Constant for GPX activity                                                                               | E46  |
| $K_M^{GSSG}$       | 1.94                      | mM                               | Michaelis constant for oxidized glutathione of glutathione reductase (GR)                               | E46  |

|                |                      |                 |                                                      |     |
|----------------|----------------------|-----------------|------------------------------------------------------|-----|
| $K_M^{NADPH}$  | 38.7                 | mM              | Michaelis constant for NADPH of GR                   | E47 |
| $k_{GR}^1$     | 0.0308               | s <sup>-1</sup> | Rate constant of GR                                  | E47 |
| $E_{GR}^T$     | $1.27 \cdot 10^{-3}$ | mM              | Intracellular concentration of GR                    | E47 |
| G <sub>T</sub> | 1 - 2                | mM              | Total intracellular pool of glutathione              | E50 |
| shunt          | 0.02                 |                 | Percentage of respiration diverted to ROS production | E13 |
| j              | 0.12                 |                 | Fraction of IMAC conductance                         | E48 |
