# Supplementary material for: A Reaction-Diffusion Model of ROS-Induced ROS Release in a Mitochondrial Network
Source: PubMed Central journal article supplement (PMC2813265; doi:10.1371/journal.pcbi.1000657), 2010-01-29
Supplement: pcbi.1000657.s003.pdf [file pcbi.1000657.s003.pdf]

**Table S3. Mitochondrial energetics and ROS-induced-ROS-release model (ME-RIRR): states variables initial values (mM).**

| Symbol                                      | Description                                               | Value                  |
|---------------------------------------------|-----------------------------------------------------------|------------------------|
| [ADP] <sub>m</sub>                          | Mitochondrial ADP concentration                           | 0.0097                 |
| [NADH]                                      | Mitochondrial NADH concentration                          | 2.084                  |
| $\Delta\Psi_m$                              | Inner mitochondrial membrane potential                    | - 124.7                |
| [ISOC]                                      | Isocitrate concentration (mitochondrial)                  | 0.108                  |
| [ $\alpha$ KG]                              | $\alpha$ ketoglutarate concentration (mitochondrial)      | $2.596 \times 10^{-4}$ |
| [SCoA]                                      | Succinyl CoA concentration (mitochondrial)                | 0.89                   |
| [Suc]                                       | Succinate concentration (mitochondrial)                   | $4.88 \times 10^{-4}$  |
| [FUM]                                       | Fumarate concentration (mitochondrial)                    | 0.0103                 |
| [MAL]                                       | Malate concentration (mitochondrial)                      | 0.0038                 |
| [OAA]                                       | Oxalacetate concentration (mitochondrial)                 | $4.743 \times 10^{-8}$ |
| [O <sub>2</sub> <sup>-</sup> ] <sub>i</sub> | O <sub>2</sub> <sup>-</sup> concentration (cytoplasmic)   | $1.192 \times 10^{-8}$ |
| [O <sub>2</sub> <sup>-</sup> ] <sub>m</sub> | O <sub>2</sub> <sup>-</sup> concentration (mitochondrial) | 0.0238                 |
| [H <sub>2</sub> O <sub>2</sub> ]            | Hydrogen peroxide (cytoplasmic)                           | $8.821 \times 10^{-9}$ |
| [GSH]                                       | Reduced glutathione (cytoplasmic)                         | 0.841                  |
| [Ca <sup>2+</sup> ] <sub>m</sub>            | Calcium concentration (mitochondrial)                     | $1.132 \times 10^{-4}$ |
